# Supplementary material for: Thrive or survive: prokaryotic life in hypersaline soils
Source: PubMed Central journal article supplement (PMC10012753; doi:10.1186/s40793-023-00475-z), 2023-03-13
Supplement: 40793_2023_475_MOESM1_ESM.pdf [file 40793_2023_475_MOESM1_ESM.pdf]

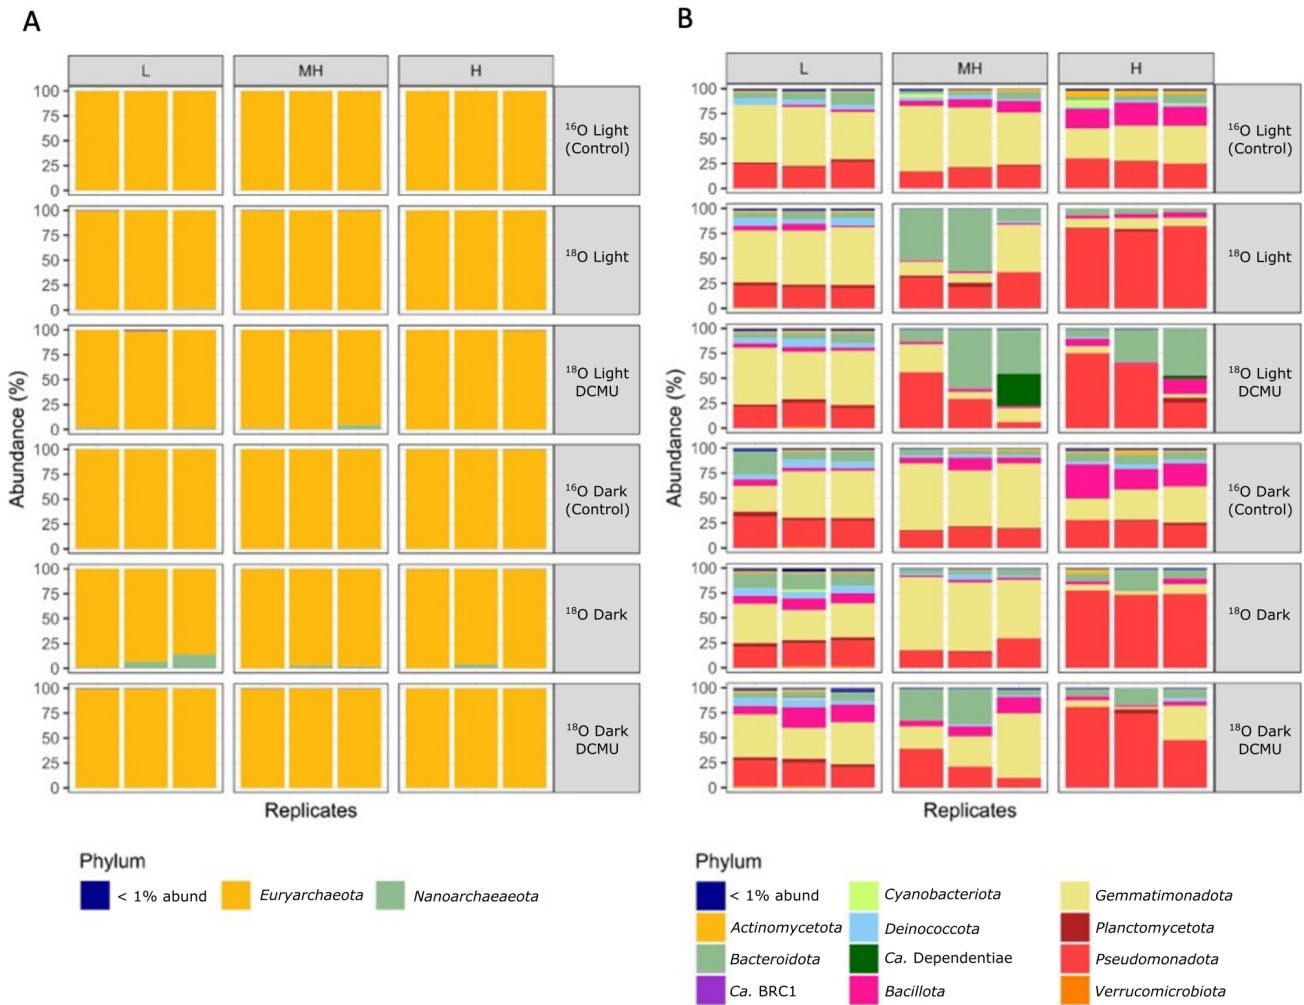

**Supplementary Figure S1.** Barplot of (A) archaeal and (B) bacterial phyla represented by more of 1 % of the reads in composite fractions L (comprising individual fractions with buoyant densities in the range 1.690-1.729 g/ml), MH (individual fractions with buoyant densities in the range 1.730-1.749 g/ml), and H (1.750-1.780 g/ml) of each control and treatment, which comprised the following conditions: 2 g of sample + 30  $\mu\text{L}$  of  $\text{H}_2^{18}\text{O}$  + (i) Light / (ii) Dark / (iii) Light + 5  $\mu\text{M}$  3-(3,4-dichlorophenyl)-1,1-dimethylurea (DCMU) / (iv) Dark + 5  $\mu\text{M}$  DCMU.
