# Supplementary material for: Thrive or survive: prokaryotic life in hypersaline soils
Source: PubMed Central journal article supplement (PMC10012753; doi:10.1186/s40793-023-00475-z), 2023-03-13
Supplement: 40793_2023_475_MOESM2_ESM.pdf [file 40793_2023_475_MOESM2_ESM.pdf]

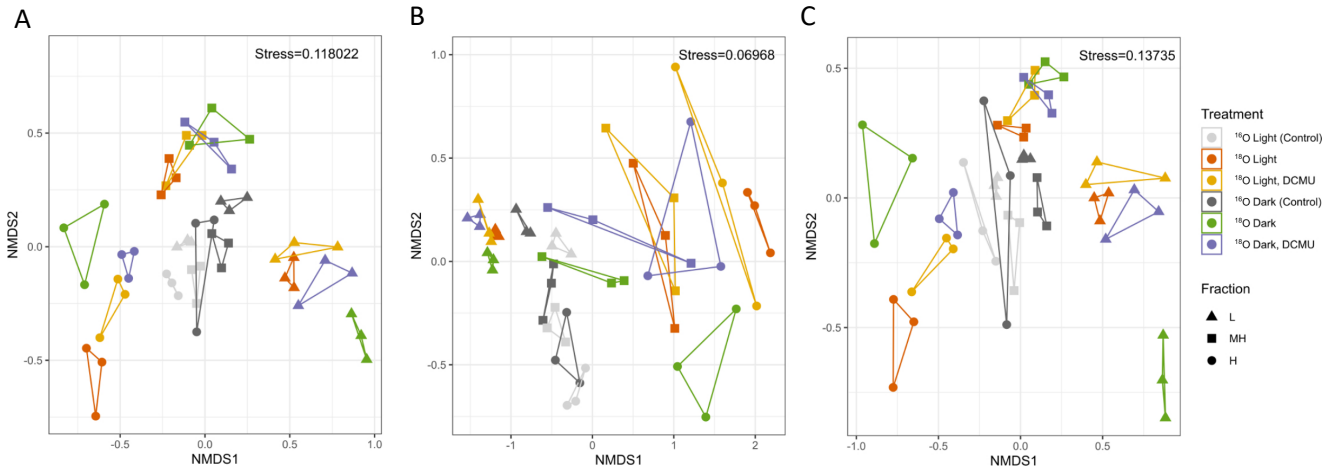

**Supplementary Figure S2.** NMDS analysis showing the relationship among the growing A) archaeal, B) bacterial, C) overall communities in each treatment (Light / Dark / Light + 5  $\mu\text{M}$  3-(3,4-dichlorophenyl)-1,1-dimethylurea (DCMU) / Dark + 5  $\mu\text{M}$  DCMU) and binned fraction (L, comprising individual fractions with buoyant densities in the range 1.690-1.729 g/ml; MH, consisting of fractions with buoyant densities in the range 1.730-1.749 g/ml and H, encompassing fractions with buoyant densities in the range 1.750-1.780 g/ml). Differences are based on Bray Curtis dissimilarity calculated at the ASV level. Colors and shapes indicate different treatments and binned fractions.
